# Supplementary material for: Rescuing Verubecestat: An Integrative Molecular Modeling and Simulation Approach for Designing Next-Generation BACE1 Inhibitors
Source: MDPI journal article supplement (doi:10.3390/ijms262412143), 2025-12-17
Supplement: s1 [file Supplementary Data S4 - Detailed RoG and SASA profiles for each simulated complex, including single-complex plots and stability analyses.pdf › Supplementary Data S4 - Detailed RoG and SASA profiles for each simulated complex, including single-complex plots and stability analyses.pdf]

## Supplementary Data S4

Detailed RoG and SASA profiles for each simulated complex, including single-complex plots and stability analyses.

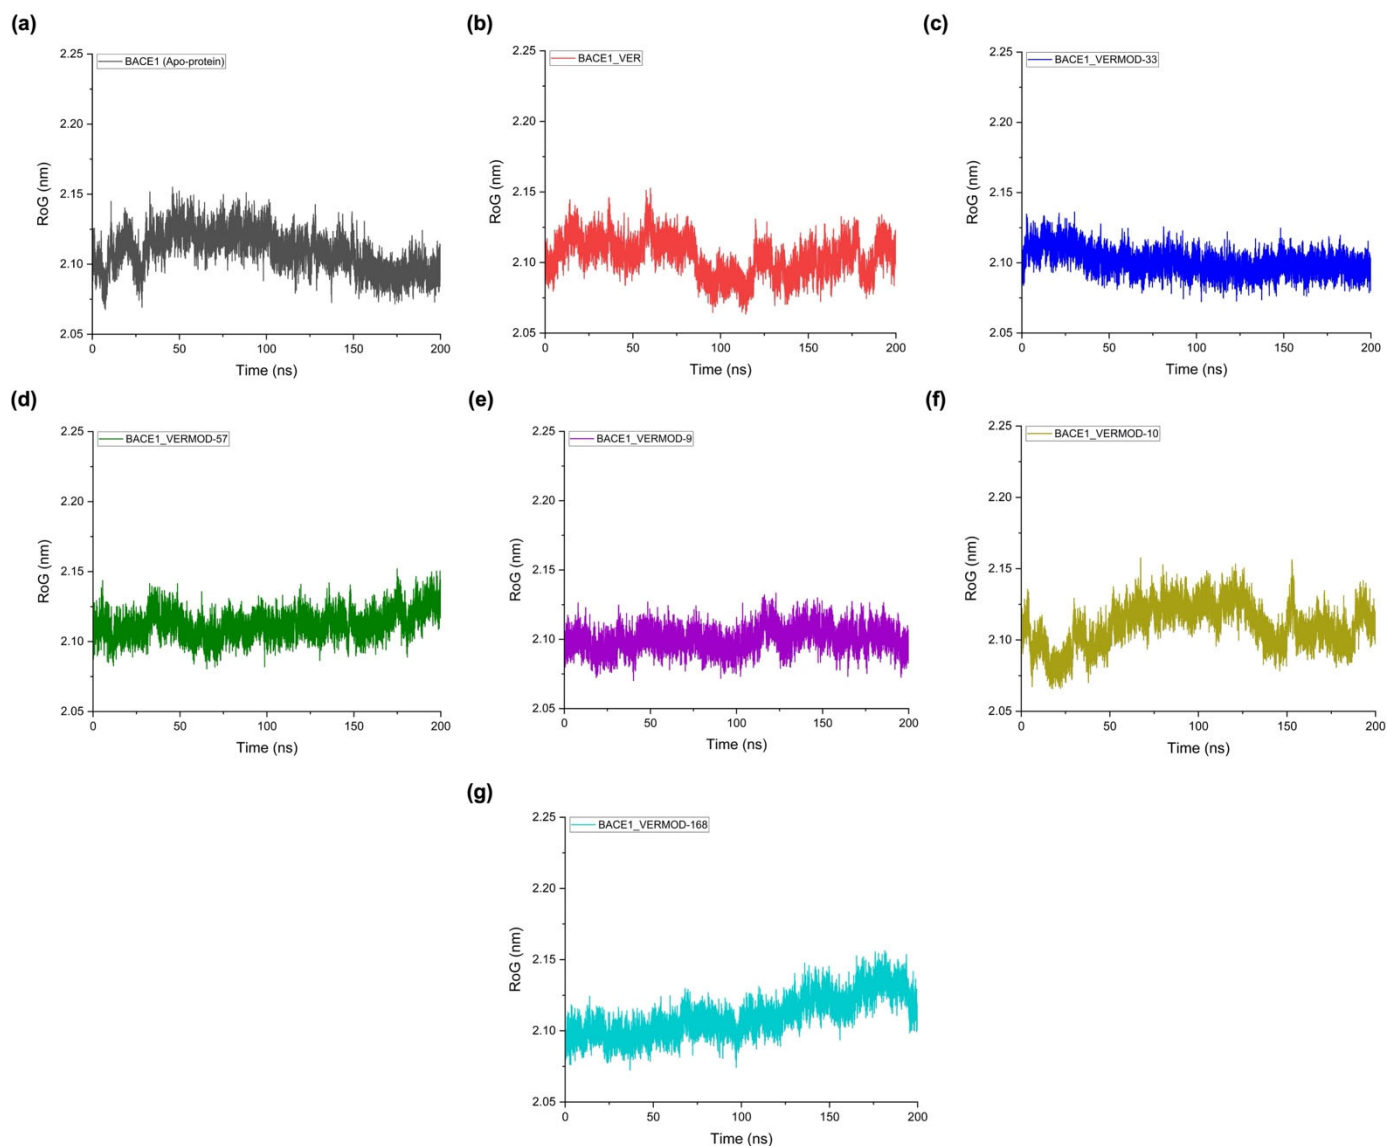

**Supplementary Figure 1.** Radius of gyration (RoG) plots. (a) BACE1 (Apo-protein). (b) BACE1\_VER complex. (c) BACE1\_VERMOD-33 complex. (d) BACE1\_VERMOD-57 complex. (e) BACE1\_VERMOD-9 complex. (f) BACE1\_VERMOD-10 complex. (g) BACE1\_VERMOD-168 complex.

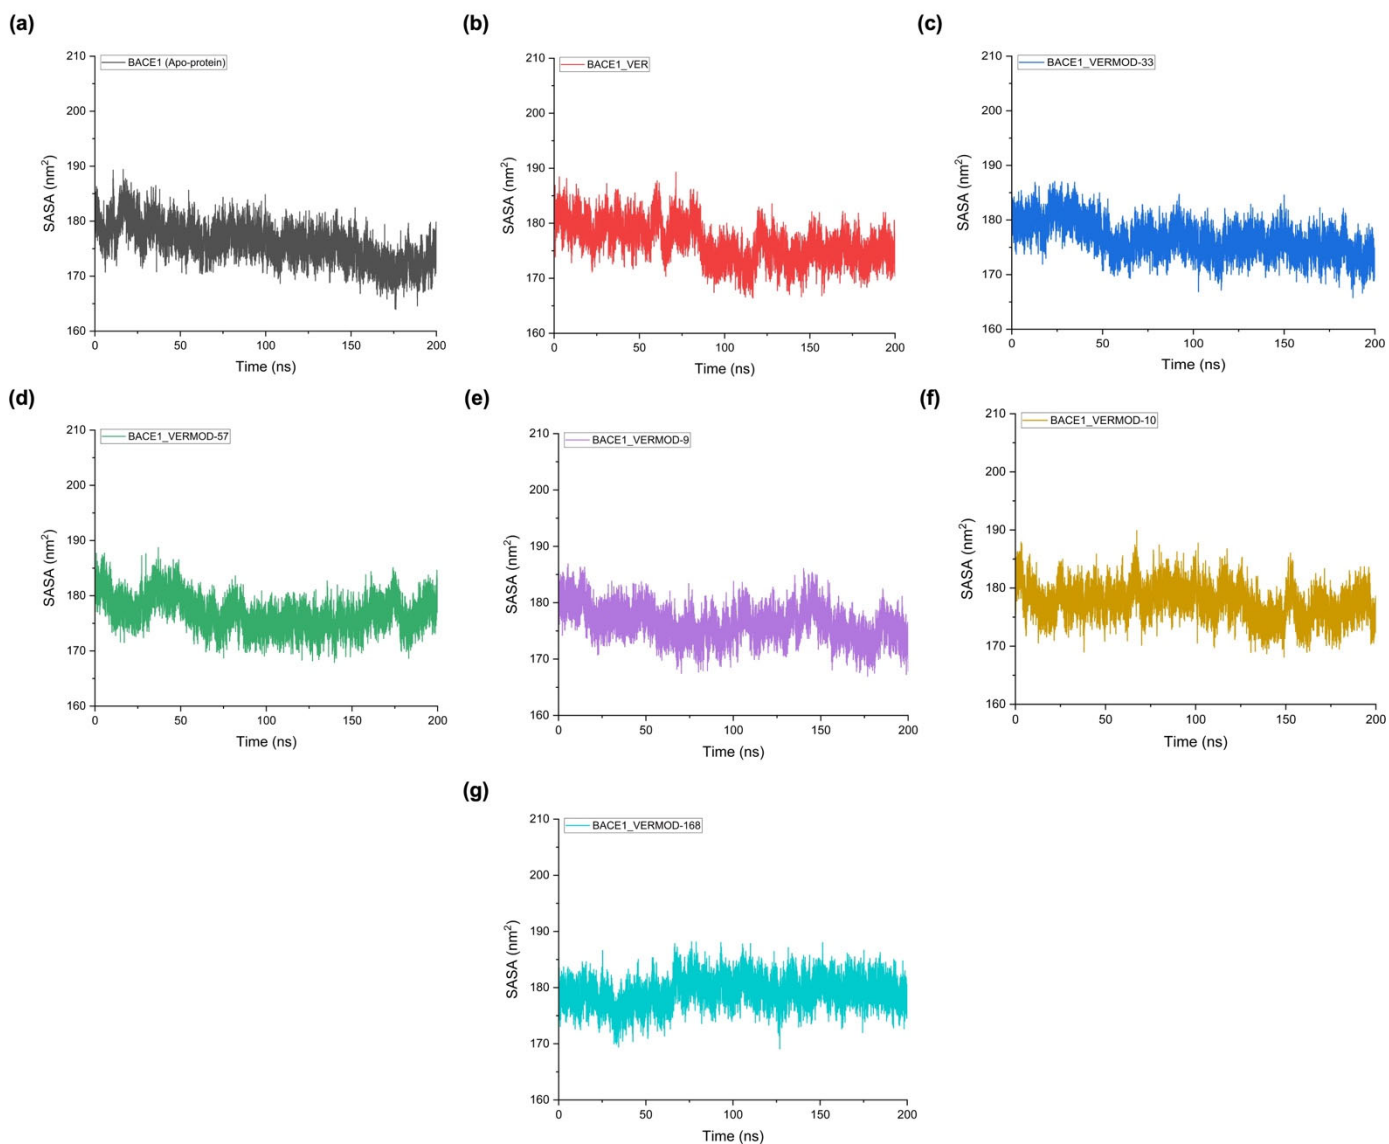

**Supplementary Figure 2.** Solvent-Accessible Surface Area (SASA) plots. (a) BACE1 (Apo-protein). (b) BACE1\_VER complex. (c) BACE1\_VERMOD-33 complex. (d) BACE1\_VERMOD-57 complex. (e) BACE1\_VERMOD-9 complex. (f) BACE1\_VERMOD-10 complex. (g) BACE1\_VERMOD-168 complex.
